# Supplementary material for: Venomics Reveals the Venom Complexity of Sea Anemone Heteractis magnifica
Source: MDPI journal article supplement (doi:10.3390/md22020071), 2024-01-28
Supplement: s1 [file s1]

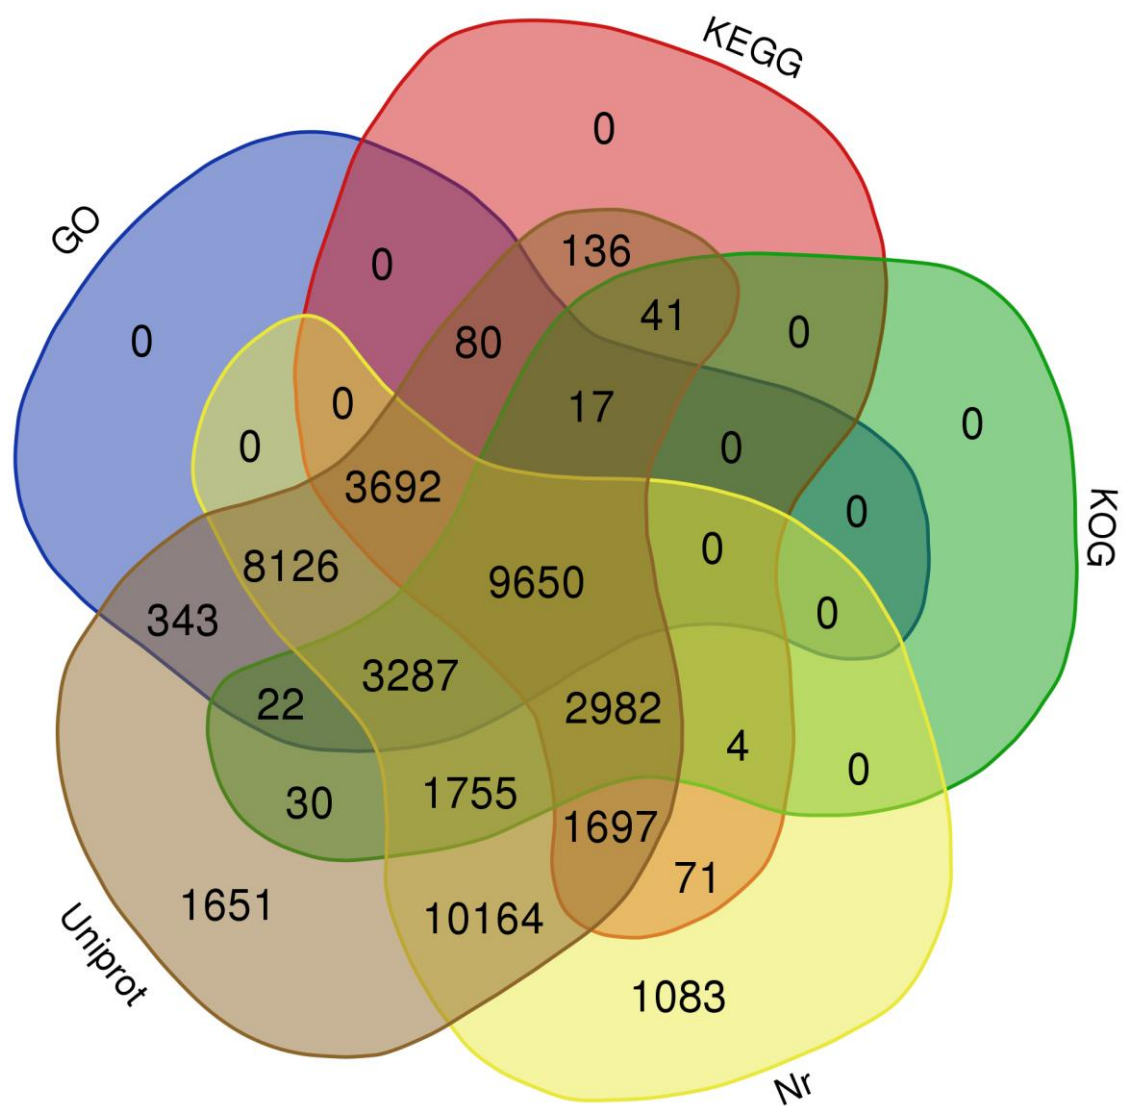

**Figure S1.** The number of annotated genes in the tentacles transcriptome of *H. magnifica*.

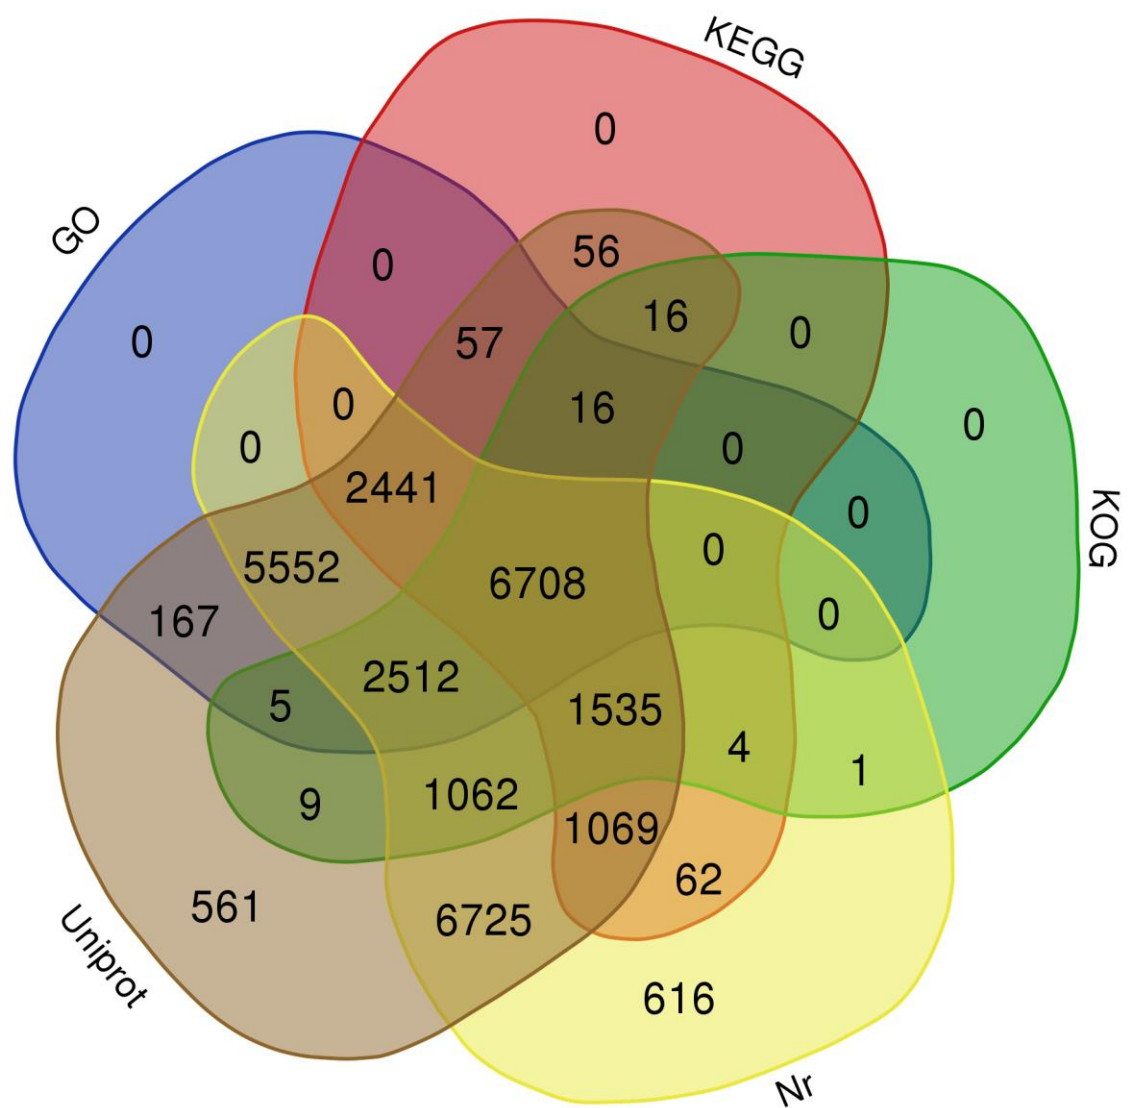

**Figure S2.** The number of annotated genes in the column transcriptome of *H. magnifica*.

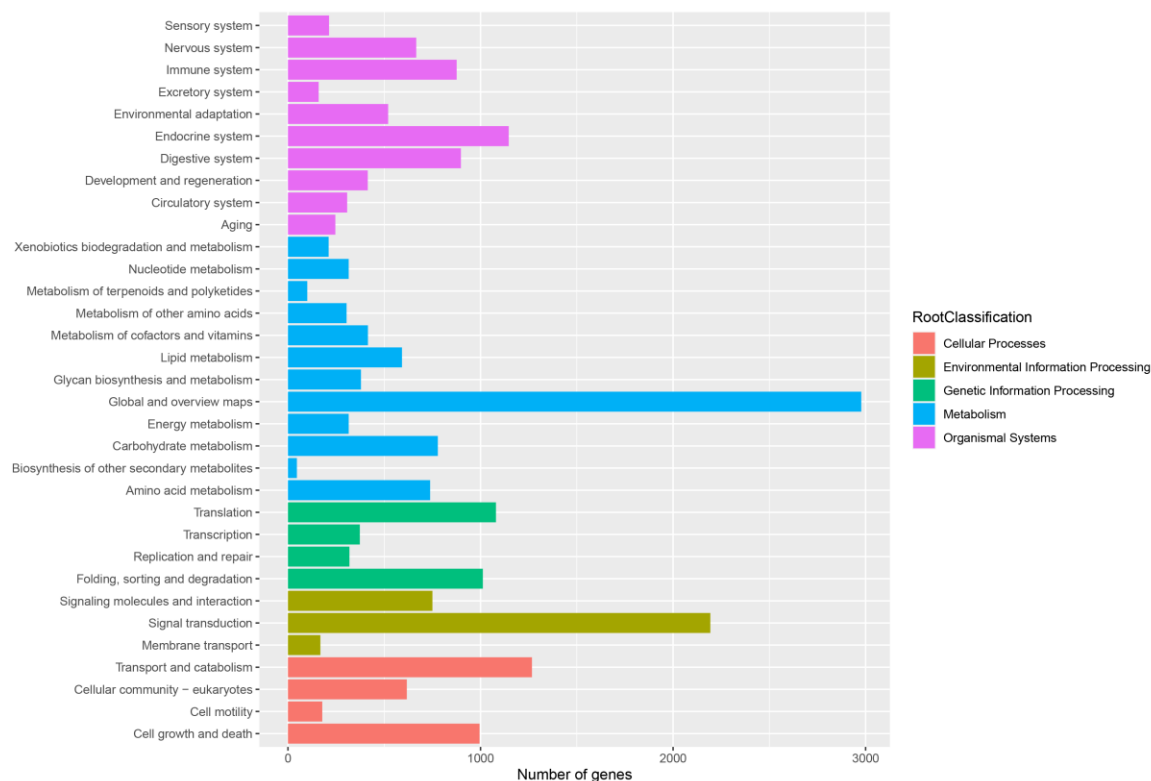

**Figure S3.** KEGG pathway annotation of the *H. magnifica* tentacles transcriptome.

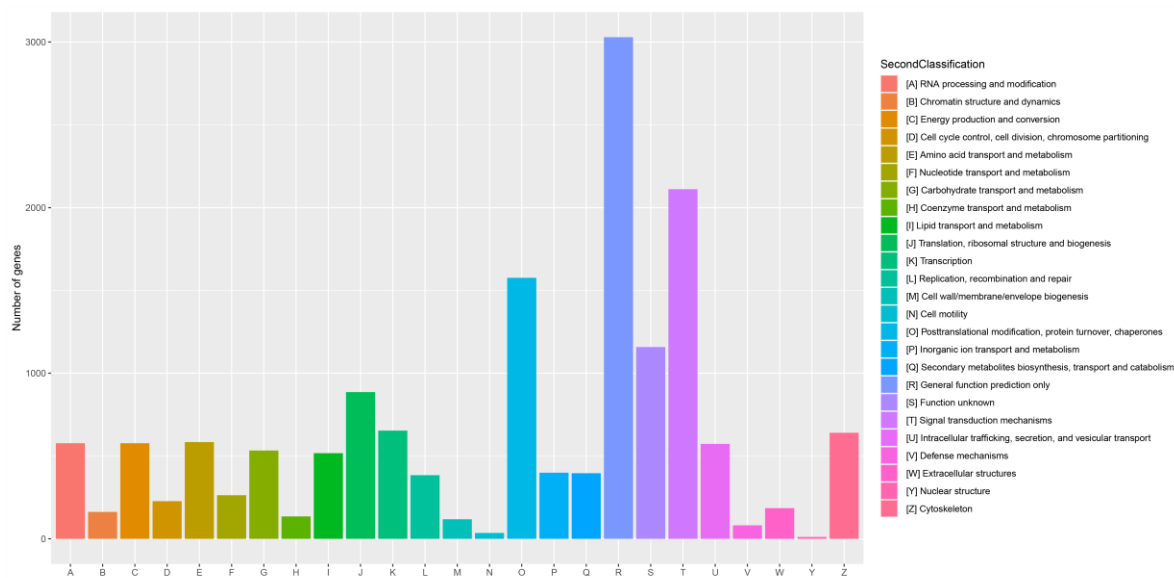

**Figure S4.** KOG analysis of the tentacles transcriptome of *H. magnifica*.

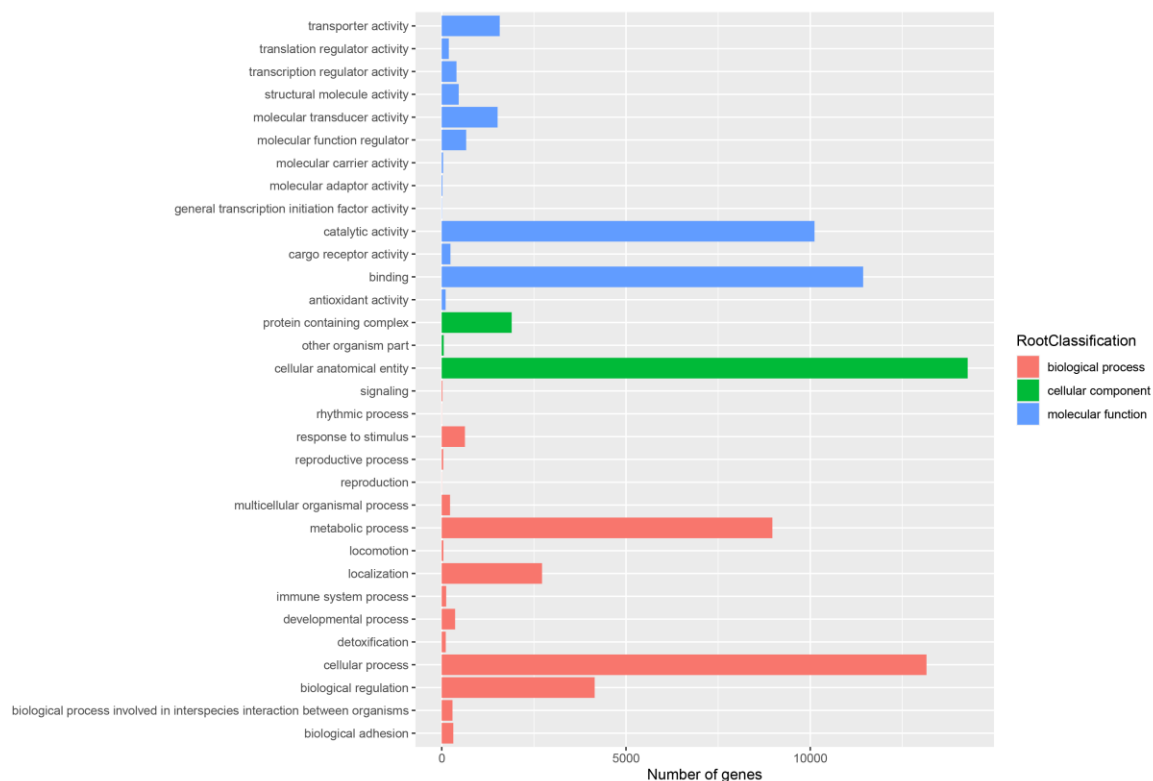

**Figure S5.** GO analysis of the tentacles transcriptome of *H. magnifica*.

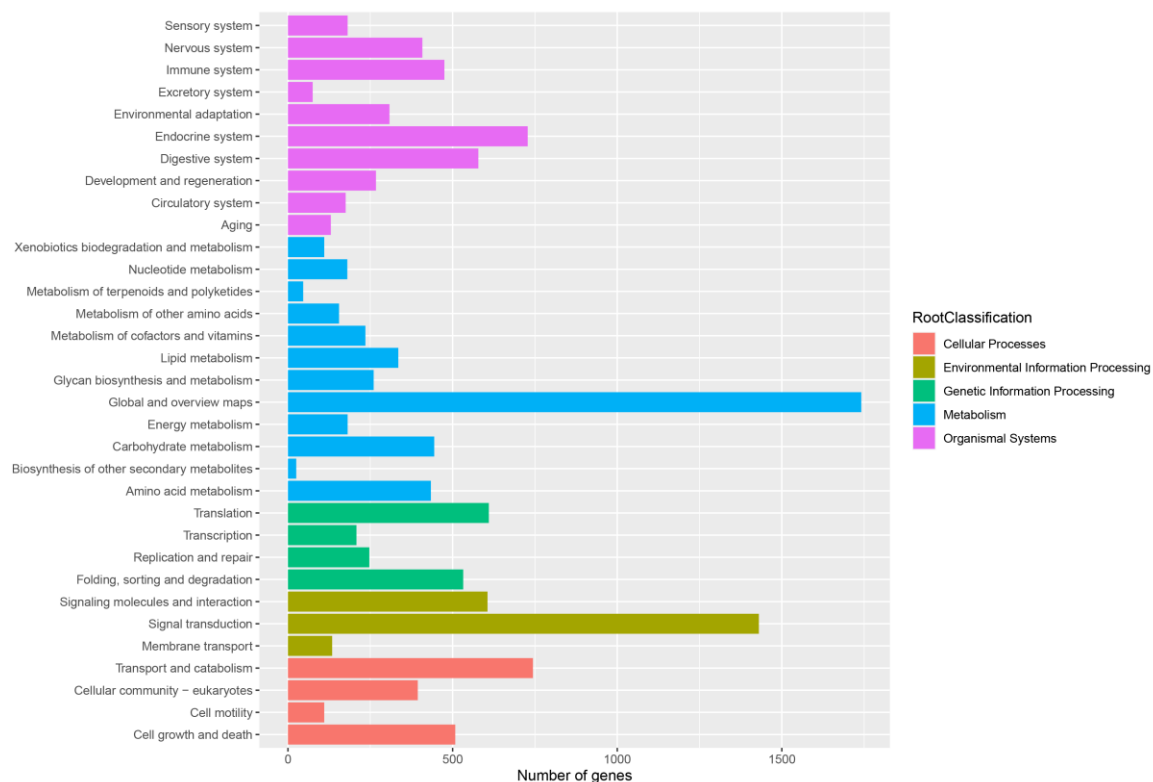

**Figure S6.** KEGG pathway annotation of the *H. magnifica* column transcriptome.

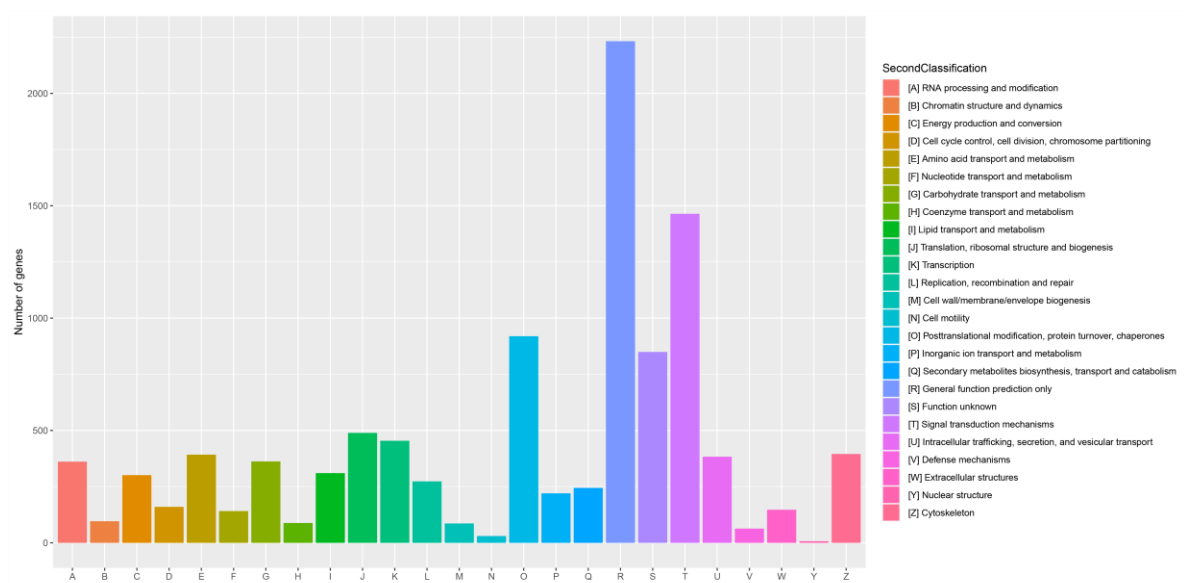

Figure S7. KOG analysis of the column transcriptome of *H. magnifica*.

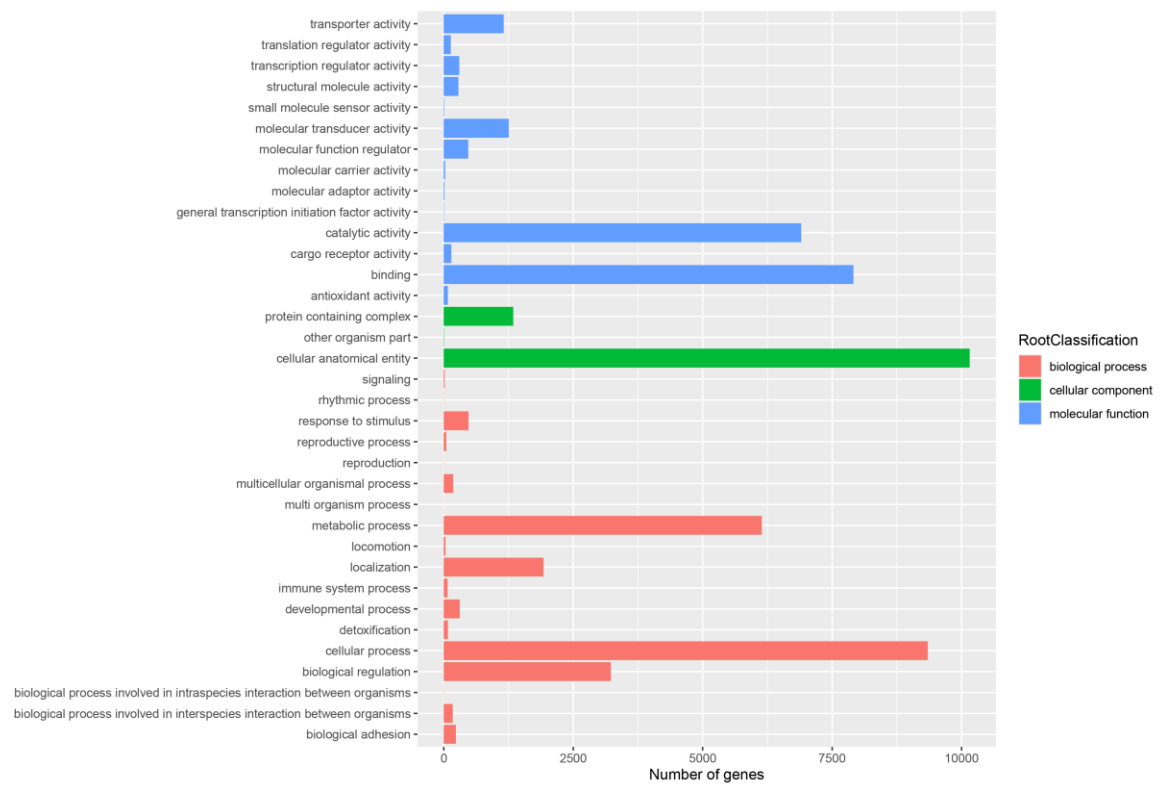

Figure S8. GO analysis of the column transcriptome of *H. magnifica*.

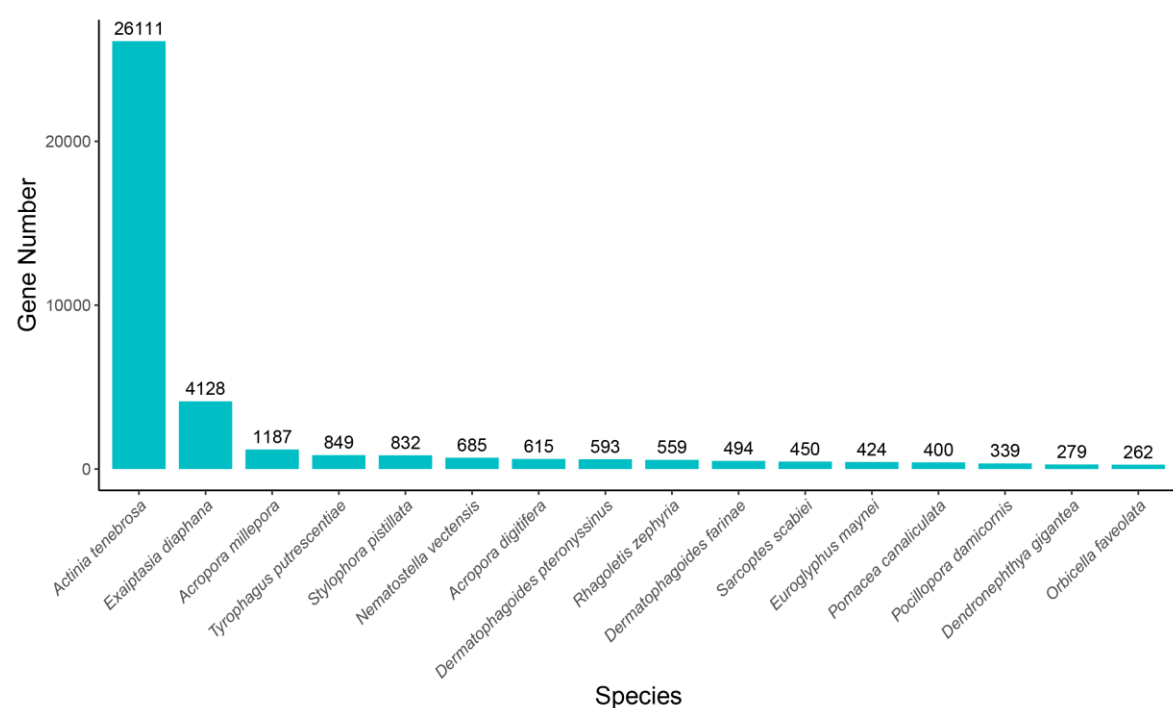

**Figure S9.** Analysis of the tentacles transcriptome of *H. magnifica* through the NCBI Nr database.

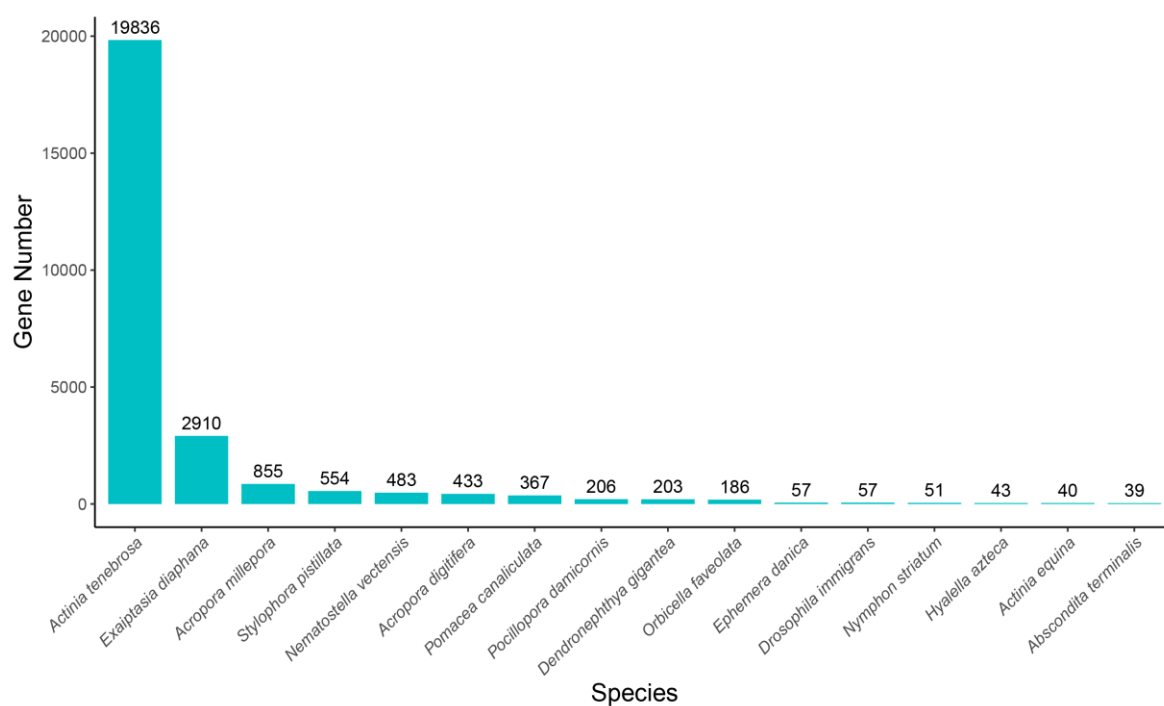

**Figure S10.** Analysis of the column transcriptome of *H. magnifica* through the NCBI Nr database.
